# Supplementary material for: Common Variation in the FTO Gene Alters Diabetes-Related Metabolic Traits to the Extent Expected Given Its Effect on BMI
Source: Oxford University Press journal article supplement (doi:10.2337/db07-1466), 2008-03-18
Supplement: db071466-sup-supps.doc [file db071466-sup-supps.doc]

**Online Supplementary Material**

Common variation in the *FTO* gene alters diabetes-related metabolic traits to the extent expected, given its effect on BMI

Rachel M Freathy, Nicholas J Timpson, Debbie A Lawlor, Anneli Pouta, Yoav Ben-Shlomo, Aimo Ruokonen, Shah Ebrahim, Beverley Shields, Eleftheria Zeggini, Michael N Weedon, Cecilia M Lindgren, Hana Lango, David Melzer, Luigi Ferrucci, Giuseppe Paolisso, Matthew J Neville, Fredrik Karpe, Colin N A Palmer, Andrew D Morris, Paul Elliott, Marjo-Riitta Jarvelin, George Davey Smith, Mark I McCarthy, Andrew T Hattersley and Timothy M Frayling.

**Supplementary Methods**

**Study Descriptions**

*NFBC1966*

The Northern Finland Birth Cohort of 1966 (NFBC1966) are offspring born to women living in the two northern-most provinces of Finland, who were invited to take part if they had expected dates of delivery during 1966 (1). The subjects included in the current analyses were invited to participate at the age of 31 years. Subjects took part in a medical examination, at which samples were taken for DNA extraction, anthropometric and blood pressure measurements were taken and various environmental exposures were assessed (2). The assay methods for fasting biochemical traits have been described previously (3; 4). The concentration of fasting insulin was measured by radioimmunoassay. All subjects gave written, informed consent.The study was approved by ethics committees in Oulu and Oxford and was carried out in accordance with the Declaration of Helsinki.

*EFSOCH*

The Exeter Family of Childhood Health (EFSOCH) is a consecutive birth cohort consisting of children born between 2000 and 2004 in central Exeter, UK, and their parents. Families were included only if parents had normal fasting glucose and HbA1c levels ≤6 mmol/l and ≤6 %, respectively (Diabetes Control and Complications Trial-corrected). Both parents attended a study visit at 28 weeks’ gestation, at which anthropometric measurements were made, DNA was collected and a fasting blood sample was taken for biochemical assays. However, the fasting blood measures for women used in the current study were taken post-pregnancy (*n=*302). For men in this study, BMI was based on measured height and weight from the baseline assessment; for women, it was based on measured height and self-reported pre-pregnancy weight. Data collection methods, including assessment of environmental exposures, have been described previously (5) Fasting insulin was measured using an insulin-specific immunochemiluminometric assay (6). Informed consent was obtained from all parents and ethical approval was obtained from the North and East Devon Research Ethics Committee.

*Oxford Biobank*

The Oxford Biobank is an age-stratified sample of men and women, aged between 30 and 50 years, that was randomly drawn from the UK National Health Service population register. Data were collected between March 2000 and April 2002: each subject attended a screening visit at which a fasting blood sample was taken for biochemical analysis, anthropometric and blood pressure measurements were made and DNA was collected (7). Fasting insulin was measured using a human insulin-specific radioimmunoassay. Any individual with a clinical diagnosis of diabetes was excluded at baseline. For information on environmental exposures and medication, subjects were asked to complete a questionnaire which was then checked with the subject at the screening visit. Since the previous analysis of *FTO* in this cohort (8), further genotyping had been carried out, so the current study included a further 389 subjects with BMI and *FTO* genotype data available. Informed consent was obtained from all participants and the study was approved by the Oxfordshire Research Ethics Committee.

*Caerphilly*

The Caerphilly study is a cohort of men aged 45-59 years at entry in 1979-83 and recruited from the town of Caerphilly, UK and five surrounding villages (9). Study data were collected over several phases. Anthropometric, blood pressure and fasting biochemical measurements used in the current analysis were selected from Phase 1, 2 or 3, depending on which phase provided the largest number of observations. DNA was collected at Phase 4. Data on environmental exposures were collected using a questionnaire at each phase of cohort description. Study methods have previously been described in detail (10; 11). Fasting insulin was measured using a radioimmunoassay based on a double antibody for insulin (12). Ethical approval was obtained from the South East Wales Research Ethics Committee and all subjects gave informed consent.

*UKT2D GCC Controls*

The UK Type 2 Diabetes Genetics Consortium Collection (UKT2D GCC) Controls were recruited from the Tayside region of Dundee, UK. Controls had not been diagnosed with diabetes at the time of recruitment (or subsequently), and were excluded from analysis if they had a fasting glucose value ≥ 7.0 mmol/l or HbA1c > 6.4 % (13). In contrast to the previous analysis of *FTO* genotype and BMI in this cohort (8), the current study included individuals over 80 years of age to maximize sample power. Additionally, further genotyping had been carried out, so the current study included 4779 subjects with BMI and *FTO* genotype data available. At study entry, each participant attended a clinical consultation, during which anthropometric, blood pressure, smoking, and physical activity data were collected, and blood samples were obtained for DNA extraction and biochemical analysis. Biochemical assays were performed at the Ninewells NHS Biochemistry Laboratory, Dundee, UK, using standard techniques. Fasting insulin was measured using a solid-phase two-site chemiluminescent immunometric assay. Whilst blood pressure and HbA1c data were available for all subjects, the maximum number of individuals with *FTO* genotype and fasting biochemical data available was 1902. Study approval was obtained from the Tayside Medical Ethics Committee and informed consent was obtained from all subjects.

*BWHHS*

The British Women’s Heart and Health Study (BWHHS) recruited female participants between 1999 and 2001, who were randomly selected from 23 British towns and were aged between 60 and 79 years at baseline assessment. Methods used at baseline have been described in detail previously (14) and included assessment of environmental exposures at a research nurse-led interview, blood pressure and anthropometric measurements (collected at a medical examination), the collection of blood samples for biochemical analysis and DNA extraction, the completion of medical questionnaires and detailed reviews of medical records. Fasting insulin was measured using an ELISA assay that does not cross-react with proinsulin (15). Local ethics committee approvals were obtained for the BWHHS and women included in these analyses provided informed written consent.

*InCHIANTI*

The InCHIANTI study (16) is a population based study of individuals collected from two small towns in Tuscany, Italy. The study is designed to assess risk factors for the onset of disability in olderpersonsand includes 298 individuals aged below 65 years and 1155 individuals aged ≥65 years. First-degree relatives were excluded from analysis. Data collection occurred between September 1998 and March 2000. Subjects participated in a home interview and attended the study clinic for evaluation of health status, anthropometric measurements and collection of fasting blood samples. The data collection methods, including biochemical assays and assessment of environmental exposures, have been described in detail previously (16; 17). Fasting insulin concentration was determined using a double-antibody, solid-phase radioimmunoassay. For the current study, 901 individuals had data available on *FTO* genotype, BMI and at least one of the metabolic traits. Study participants gave informed consent and the study protocol was ratified by the Italian National Institute of Research and Care of Aging Institutional Review Board.

**Genotyping and quality control**

Further genotyping had been carried out for ~1000 UKT2D GCC Controls and ~400 Oxford Biobank participants since the previous study of *FTO* genotype in these cohorts (8). As before, genotypes in these cohorts did not show evidence of deviation from Hardy-Weinberg Equilibrium (*P* = 0.75 and 0.30, respectively), the concordance rates between duplicate samples remained at 100% and the genotyping call rates were >96 %.

**Sensitivity analyses**

To assess whether the inclusion of individuals with diabetes was responsible for driving the associations observed in our study, we repeated the analyses and meta-analyses without these individuals. Two cohorts (EFSOCH and UKT2D GCC Controls) consisted of non-diabetic individuals only (exclusion criteria are explained in the study descriptions). Exclusions from the five other cohorts were made using the maximum information available to define a case. This included information available on clinical diagnosis (available in BWHHS and InCHIANTI [and already excluded from Oxford Biobank]; anyone with a clinical diagnosis was excluded), information on treatment with oral hypoglycaemic agents and/or insulin (available in all studies; anyone on such treatment was excluded), and information on fasting glucose (available in all studies; anyone with a fasting blood glucose level of ≥ 7.0 mmol/l was excluded). Individuals with diabetes according to these criteria were excluded from NFBC1966 (2.5%), Oxford Biobank (0.9%), Caerphilly (2.0%), BWHHS (9.4%) and InCHIANTI (10.8%).

Plasma concentrations of triglycerides, HDL- and LDL-cholesterol are likely to be altered if a subject is taking lipid-lowering medication. Systolic and diastolic blood pressure measures are likely to be altered if a subject is taking blood pressure-lowering medication. To assess whether the inclusion of individuals on such medication affected the results of our study, we performed further sensitivity analyses. No data were available on these types of medication for the Caerphilly or UKT2D GCC studies, so we excluded these studies completely from these sensitivity analyses. Complete data on lipid lowering medication were not available for the EFSOCH study. However, since the median age of this cohort is 33 years, the overall percentage is likely to be very low, so we included this cohort to maximize power. We excluded individuals known to be on lipid-lowering medication from NFBC1966 (0.1%), Oxford Biobank (0.3%), BWHHS (7.5%) and InCHIANTI (4.2%,). We performed analyses of the associations of HDL-cholesterol, LDL-cholesterol and triglycerides with BMI and *FTO* genotype within these five studies, and used meta-analysis to combine the summary statistics. We excluded individuals known to be on blood pressure medication from NFBC1966 (2.1%), Oxford Biobank (2.6%), BWHHS (30.2%) and InCHIANTI (37.3%,). We performed analyses of the associations of systolic and diastolic blood pressure with BMI and *FTO* genotype within these five studies, and used meta-analysis to combine the summary statistics.

**Comparing observed with expected effect sizes**

To assess the evidence of a difference between the observed and expected effect sizes of the association between *FTO* genotype and each metabolic trait, we computed a *Z*-statistic using the formula:

*Z* = [β1 – β2] / SE[β1 – β2]

where β1 and β2 are the observed and expected effect sizes, and SE is the standard error of the difference in effect sizes.

**Supplementary Table 1a-j. Associations of ten metabolic traits with BMI and with *FTO* rs9939609 genotype in seven studies.**

**(a) Fasting insulin**

| **Study** | **Total N1** | **% male** | **Age, y (median, IQR)** | **Trait-BMI effect size (SE)2** | **Trait-BMI effect size (SE)3** | **Mean fasting insulin in pmol/l (95% CI) by genotype4** | | | **Per-A allele effect size (SE)5,6** | ***P* value5** | **Per-A allele effect size (SE)6,7** | ***P* value7** |
| --- | --- | --- | --- | --- | --- | --- | --- | --- | --- | --- | --- | --- |
| **TT** | **AT** | **AA** |
| NFBC1966 | 4198 | 47.3 | 31 (0) | 0.495 (0.013) | - | 46.6 (45.8, 47.5) | 47.0 (46.2, 47.8) | 47.4 (46.1, 48.7) | 0.020 (0.021) | 0.335 | - | - |
| EFSOCH | 878 | 100 | 32 (29,36) | 0.485 (0.029) | 0.492 (0.030) | 54.6 (51.3, 58.2) | 53.3 (50.5, 56.1) | 54.8 (49.7, 60.5) | -0.009  (0.051) | 0.859 | -0.008  (0.051) | 0.869 |
| Oxford Biobank | 1147 | 51.2 | 42 (36,46) | 0.470 (0.026) | 0.469 (0.026) | 57.0 (54.3, 59.8) | 55.7 (53.3, 58.2) | 60.9 (56.6, 65.5) | 0.043  (0.042) | 0.308 | 0.042  (0.042) | 0.316 |
| Caerphilly | 948 | 100 | 57 (53,61) | 0.324 (0.030) | 0.323 (0.030) | 31.5 (29.2, 34.0) | 33.3 (31.2, 35.5) | 34.9 (30.9, 39.5) | 0.073 (0.048) | 0.134 | 0.074  (0.048) | 0.225 |
| UKT2D GCC Controls | 781 | 47.0 | 59 (51,69) | 0.529  (0.032) | 0.525 (0.032) | 64.6 (60.5, 68.9) | 62.0 (58.6, 65.7) | 61.9 (56.1, 68.3) | -0.043  (0.051) | 0.403 | -0.044  (0.051) | 0.394 |
| BWHHS | 3206 | 0 | 69 (64,73) | 0.461  (0.016) | 0.464  (0.016) | 40.4 (39.0, 41.9 ) | 42.1 (40.7, 43.5) | 44.4 (42.0, 47.0) | 0.070 (0.025) | 0.006 | 0.070, (0.025) | 0.006 |
| InChianti | 937 | 43.7 | 71 (66,77) | 0.251  (0.033) | 0.239 (0.033) | 62.5 (58.8, 66.4) | 65.5 (62.4, 68.9) | 69.1 (63.9, 74.8) | 0.093  (0.046) | 0.044 | 0.096  (0.046) | 0.037 |

1Number of individuals with *FTO* genotype and fasting insulin available

2Regression coefficient (beta) and standard error from linear regression of log10(fasting insulin) Z score against log10BMI Z score

3Regression coefficient (beta) and standard error from linear regression of log10(fasting insulin) Z score against log10BMI Z score, adjusted for age

4Geometric means and back-transformed 95% CIs, adjusted for sex

5Effect size (regression coefficient), standard error and *P* value are calculated using linear regression under an additive model, adjusted for sex

6Effect size and standard error values are expressed in SD units

7Effect size (regression coefficient), standard error and *P* value are calculated using linear regression under an additive model, adjusted for sex and age

**(b) Fasting glucose**

| **Study** | **Total N1** | **% male** | **Age, y (median, IQR)** | **Trait-BMI effect size (SE)2** | **Trait-BMI effect size (SE)3** | **Mean fasting glucose in mmol/l (95% CI) by genotype4** | | | **Per-A allele effect size (SE)5,6** | ***P* value5** | **Per-A allele effect size (SE)6,7** | ***P* value7** |
| --- | --- | --- | --- | --- | --- | --- | --- | --- | --- | --- | --- | --- |
| **TT** | **AT** | **AA** |
| NFBC1966 | 4225 | 47.4 | 31 (0) | 0.145  (0.014) | - | 5.03 (5.00, 5.06) | 5.01 (4.98, 5.03) | 5.04 (5.00, 5.08) | -0.002 (0.020) | 0.921 | - | - |
| EFSOCH | 1184 | 74.8 | 33 (30,37) | 0.179 (0.029) | 0.168 (0.029) | 4.60 (4.56, 4.65) | 4.57 (4.53, 4.61) | 4.62 (4.55, 4.69) | -0.006 (0.043) | 0.884 | -0.002 (0.043) | 0.958 |
| Oxford Biobank | 1151 | 51.2 | 42 (36,46) | 0.262 (0.028) | 0.258 (0.028) | 5.15 (5.10, 5.19) | 5.13 (5.09, 5.17) | 5.22 (5.16, 5.29) | 0.059 (0.042) | 0.158 | 0.058 (0.042) | 0.167 |
| Caerphilly | 1069 | 100 | 57 (53,60) | 0.154  (0.030) | 0.155  (0.030) | 4.83 (4.75, 4.92) | 4.80 (4.74, 4.86) | 4.91 (4.79, 5.03) | 0.025 (0.045) | 0.585 | 0.023 (0.045) | 0.614 |
| UKT2D GCC Controls | 1867 | 47.8 | 59 (50,70) | 0.248  (0.022) | 0.241 (0.022) | 4.93 (4.89, 4.97) | 4.90 (4.87, 4.93) | 4.94 (4.89, 5.00) | -0.001 (0.033) | 0.968 | -0.005  (0.033) | 0.887 |
| BWHHS | 3179 | 0 | 69 (64,73) | 0.175  (0.017) | 0.179  (0.017) | 5.87 (5.81, 5.93) | 5.92 (5.87, 5.98) | 6.05 (5.95, 6.16) | 0.074 (0.026) | 0.004 | 0.074 (0.026) | 0.004 |
| InChianti | 957 | 43.4 | 71 (66,78) | 0.247  (0.033) | 0.234 (0.033) | 5.12 (5.01, 5.25) | 5.05 (4.96, 5.15) | 5.24 (5.08, 5.40) | 0.037  (0.046) | 0.418 | 0.040  (0.046) | 0.377 |

1Number of individuals with *FTO* genotype and fasting glucose available

2Regression coefficient (beta) and standard error from linear regression of log10(fasting glucose) Z score against log10BMI Z score

3Regression coefficient (beta) and standard error from linear regression of log10(fasting glucose) Z score against log10BMI Z score, adjusted for age

4Geometric means and back-transformed 95% CIs, adjusted for sex

5Effect size (regression coefficient), standard error and *P* value are calculated using linear regression under an additive model, adjusted for sex

6Effect size and standard error values are expressed in SD units

7Effect size (regression coefficient), standard error and *P* value are calculated using linear regression under an additive model, adjusted for sex and age

**(c) Fasting HDL-cholesterol**

| **Study** | **Total N1** | **% male** | **Age, y (median, IQR)** | **Trait-BMI effect size (SE)2** | **Trait-BMI effect size (SE)3** | **Mean fasting HDL-cholesterol in mmol/l (95% CI) by genotype4** | | | **Per-A allele effect size (SE)5,6** | ***P* value5** | **Per-A allele effect size (SE)6,7** | ***P* value7** |
| --- | --- | --- | --- | --- | --- | --- | --- | --- | --- | --- | --- | --- |
| **TT** | **AT** | **AA** |
| NFBC1966 | 4237 | 47.4 | 31 (0) | -0.333  (0.015) | - | 1.52 (1.50, 1.53) | 1.51 (1.49, 1.52) | 1.48 (1.46, 1.51) | -0.045  (0.022) | 0.040 | - | - |
| EFSOCH | 1176 | 74.5 | 33 (30,37) | -0.339 (0.028) | -0.347 (0.028) | 1.51 (1.47, 1.55) | 1.52 (1.48, 1.55) | 1.51 (1.45, 1.57) | 0.007  (0.044) | 0.866 | 0.009  (0.044) | 0.840 |
| Oxford Biobank | 1150 | 51.2 | 42 (36,46) | -0.323 (0.028) | -0.328 (0.028) | 1.34 (1.31, 1.37) | 1.32 (1.30, 1.35) | 1.27 (1.23, 1.31) | -0.102  (0.042) | 0.015 | -0.103  (0.042) | 0.014 |
| Caerphilly | 1046 | 100 | 57 (53,60) | -0.180  (0.030) | -0.179  (0.030) | 1.36 (1.33, 1.40) | 1.32 (1.29, 1.35) | 1.34 (1.27, 1.41) | -0.051 (0.046) | 0.262 | -0.055 (0.046) | 0.227 |
| UKT2D GCC Controls | 1902 | 48.0 | 59 (50,70) | -0.334 (0.021) | -0.338 (0.021) | 1.61 (1.58, 1.64) | 1.62 (1.59, 1.64) | 1.62 (1.57, 1.66) | 0.016  (0.033) | 0.626 | 0.015  (0.033) | 0.646 |
| BWHHS | 3191 | 0 | 69 (64,73) | -0.293  (0.017) | -0.292  (0.017) | 1.62 (1.60, 1.65) | 1.58 (1.56, 1.61) | 1.60 (1.56, 1.64) | -0.041 (0.026) | 0.109 | -0.041 (0.026) | 0.108 |
| InChianti | 957 | 43.4 | 71 (66,78) | -0.271 (0.032) | -0.269 (0.032) | 1.39 (1.35, 1.43) | 1.37 (1.34, 1.40) | 1.40 (1.35, 1.46) | 0.017  (0.046) | 0.719 | 0.014  (0.046) | 0.752 |

1Number of individuals with *FTO* genotype and fasting HDL available

2Regression coefficient (beta) and standard error from linear regression of log10(fasting HDL) Z score against log10BMI Z score

3Regression coefficient (beta) and standard error from linear regression of log10(fasting HDL) Z score against log10BMI Z score, adjusted for age

4Geometric means and back-transformed 95% CIs, adjusted for sex

5Effect size (regression coefficient), standard error and *P* value are calculated using linear regression under an additive model, adjusted for sex

6Effect size and standard error values are expressed in SD units

7Effect size (regression coefficient), standard error and *P* value are calculated using linear regression under an additive model, adjusted for sex and age

**(d) Fasting LDL-cholesterol**

| **Study** | **Total N1** | **% male** | **Age, y (median, IQR)** | **Trait-BMI effect size (SE)2** | **Trait-BMI effect size (SE)3** | **Mean fasting LDL-cholesterol in mmol/l (95% CI) by genotype4** | | | **Per-A allele effect size (SE)5,6** | ***P* value5** | **Per-A allele effect size (SE)6,7** | ***P* value7** |
| --- | --- | --- | --- | --- | --- | --- | --- | --- | --- | --- | --- | --- |
| **TT** | **AT** | **AA** |
| NFBC1966 | 4225 | 47.4 | 31 (0) | 0.241  (0.015) | - | 2.85 (2.81, 2.89) | 2.89 (2.85, 2.93) | 2.91 (2.85, 2.97) | 0.040 (0.022) | 0.073 | - | - |
| EFSOCH | 1146 | 74.9 | 33 (30,37) | 0.207 (0.029) | 0.192 (0.029) | 2.67 (2.59, 2.75) | 2.60 (2.54, 2.67) | 2.68 (2.56, 2.82) | -0.015 (0.044) | 0.733 | -0.010 (0.043) | 0.819 |
| Oxford Biobank | 1150 | 51.2 | 42 (36,46) | 0.161 (0.029) | 0.152 (0.029) | 3.44 (3.35, 3.52) | 3.42 (3.34, 3.50) | 3.49 (3.36, 3.62) | 0.022 (0.042) | 0.602 | 0.019 (0.041) | 0.648 |
| Caerphilly | 1005 | 100 | 57 (53,61) | 0.028  (0.031) | 0.028  (0.031) | 3.60 (3.48, 3.71) | 3.64 (3.55, 3.74) | 3.54 (3.35, 3.74) | -0.007 (0.047) | 0.874 | -0.006 (0.047) | 0.900 |
| UKT2D GCC Controls | 1876 | 47.7 | 59 (50,70) | 0.082 (0.023) | 0.081 (0.023) | 2.96 (2.89, 3.04) | 2.93 (2.86, 2.99) | 2.94 (2.84, 3.05) | -0.015 (0.033) | 0.662 | -0.015 (0.033) | 0.655 |
| BWHHS | 3117 | 0 | 69 (64,73) | 0.015  (0.018) | 0.017  (0.018) | 3.97 (3.91, 4.04) | 4.01 (3.95, 4.07) | 3.96 (3.87, 4.06) | 0.005 (0.026) | 0.853 | 0.005 (0.026) | 0.853 |
| InChianti | 957 | 43.4 | 71 (66,78) | 0.163 (0.032) | 0.148 (0.032) | 3.32 (3.21, 3.42) | 3.30 (3.22, 3.39) | 3.43 (3.29, 3.58) | 0.049 (0.046) | 0.288 | 0.051 (0.046) | 0.261 |

1Number of individuals with *FTO* genotype and fasting LDL available

2Regression coefficient (beta) and standard error from linear regression of log10(fasting LDL) Z score against log10BMI Z score

3Regression coefficient (beta) and standard error from linear regression of log10(fasting LDL) Z score against log10BMI Z score, adjusted for age

4Geometric means and back-transformed 95% CIs, adjusted for sex

5Effect size (regression coefficient), standard error and *P* value are calculated using linear regression under an additive model, adjusted for sex

6Effect size and standard error values are expressed in SD units

7Effect size (regression coefficient), standard error and *P* value are calculated using linear regression under an additive model, adjusted for sex and age

(e) Fasting triglyderides

| **Study** | **Total N1** | **% male** | **Age, y (median, IQR)** | **Trait-BMI effect size (SE)2** | **Trait-BMI effect size (SE)3** | **Mean fasting triglycerides in mmol/l (95% CI) by genotype4** | | | **Per-A allele effect size (SE)5,6** | ***P* value5** | **Per-A allele effect size (SE)6,7** | ***P* value7** |
| --- | --- | --- | --- | --- | --- | --- | --- | --- | --- | --- | --- | --- |
| **TT** | **AT** | **AA** |
| NFBC1966 | 4236 | 47.4 | 31 (0) | 0.377  (0.014) | - | 1.03 (1.01, 1.05) | 1.03 (1.01, 1.05) | 1.07 (1.03, 1.11) | 0.025  (0.022) | 0.260 | - | - |
| EFSOCH | 1175 | 75.3 | 33 (30,37) | 0.367 (0.028) | 0.363 (0.028) | 0.99 (0.94, 1.05) | 1.05 (1.00, 1.10) | 1.04 (0.96, 1.13) | 0.063  (0.044) | 0.150 | 0.065  (0.044) | 0.134 |
| Oxford Biobank | 1151 | 51.2 | 42 (36,46) | 0.436 (0.027) | 0.432 (0.027) | 1.08 (1.03, 1.13) | 1.06 (1.02, 1.11) | 1.19 (1.11, 1.27) | 0.082  (0.042) | 0.049 | 0.081  (0.042) | 0.053 |
| Caerphilly | 1038 | 100 | 57 (53,60) | 0.212  (0.030) | 0.210  (0.030) | 1.46 (1.38, 1.55) | 1.45 (1.39, 1.52) | 1.53 (1.39, 1.68) | 0.027  (0.046) | 0.553 | 0.031  (0.046) | 0.493 |
| UKT2D GCC Controls | 1898 | 48.0 | 59 (50,70) | 0.309 (0.022) | 0.306 (0.022) | 1.18 (1.14, 1.22) | 1.18 (1.14, 1.22) | 1.18 (1.12, 1.25) | -0.0007  (0.033) | 0.984 | -0.002  (0.033) | 0.956 |
| BWHHS | 3196 | 0 | 69 (64,73) | 0.290  (0.017) | 0.293  (0.017) | 1.65 (1.61, 1.69) | 1.67 (1.64, 1.71) | 1.67 (1.60, 1.74) | 0.020 (0.026) | 0.436 | 0.020 (0.026) | 0.438 |
| InChianti | 957 | 43.4 | 71 (66,78) | 0.286 (0.032) | 0.269 (0.032) | 1.25 (1.18, 1.32) | 1.25 (1.20, 1.31) | 1.27 (1.18, 1.36) | 0.015  (0.046) | 0.750 | 0.020  (0.045) | 0.664 |

1Number of individuals with *FTO* genotype and fasting triglyderides available

2Regression coefficient (beta) and standard error from linear regression of log10(fasting triglyderides) Z score against log10BMI Z score

3Regression coefficient (beta) and standard error from linear regression of log10(fasting triglyderides) Z score against log10BMI Z score, adjusted for age

4Geometric means and back-transformed 95% CIs, adjusted for sex

5Effect size (regression coefficient), standard error and *P* value are calculated using linear regression under an additive model, adjusted for sex

6Effect size and standard error values are expressed in SD units

7Effect size (regression coefficient), standard error and *P* value are calculated using linear regression under an additive model, adjusted for sex and age

(f) Systolic blood pressure (SBP)

| **Study** | **Total N1** | **% male** | **Age, y (median, IQR)** | **Trait-BMI effect size (SE)2** | **Trait-BMI effect size (SE)3** | **Mean systolic blood pressure in mmHg (95% CI) by genotype4** | | | **Per-A allele effect size (SE)5,6** | ***P* value5** | **Per-A allele effect size (SE)6,7** | ***P* value7** |
| --- | --- | --- | --- | --- | --- | --- | --- | --- | --- | --- | --- | --- |
| **TT** | **AT** | **AA** |
| NFBC1966 | 4431 | 48.2 | 31 (0) | 0.310  (0.014) | - | 124.0 (123.4, 124.6) | 124.2 (123.7, 124.7) | 124.7 (123.8, 125.6) | 0.026 (0.022) | 0.233 | - | - |
| EFSOCH | SBP not available | | | | | | | | | | | |
| Oxford Biobank | 1154 | 51.0 | 42 (36,46) | 0.344 (0.028) | 0.337 (0.027) | 118.2 (117.1, 119.4) | 117.3 (116.3, 118.4) | 118.6 (116.8, 120.3) | -0.002 (0.042) | 0.963 | -0.004 (0.041) | 0.918 |
| Caerphilly | 1081 | 100 | 57 (53,60) | 0.218  (0.029) | 0.223  (0.029) | 137.7 (136.0, 139.5) | 137.6 (136.1, 139.2) | 141.6 (138.7, 144.6) | 0.078 (0.045) | 0.083 | 0.068 (0.044) | 0.123 |
| UKT2D GCC Controls | 4786 | 49.4 | 60 (50,70) | 0.173 (0.014) | 0.161 (0.013) | 134.5 (133.7, 135.4) | 134.1 (133.3, 134.9) | 134.5 (133.2, 135.9) | -0.006 (0.021) | 0.766 | -0.012 (0.019) | 0.516 |
| BWHHS | 3227 | 0 | 69 (64,73) | 0.057  (0.018) | 0.074  (0.017) | 144.6 (143.3, 146.1) | 145.3 (144.0, 146.5) | 145.8 (143.6, 148.0) | 0.023 (0.025) | 0.357 | 0.022 (0.024) | 0.370 |
| InChianti | 945 | 44.0 | 71 (66,77) | 0.168 (0.033) | 0.115 (0.029) | 145.2 (142.8, 147.6) | 142.9 (141.0, 144.8) | 146.5 (143.4, 149.7) | 0.013 (0.046) | 0.787 | 0.030 (0.040) | 0.453 |

1Number of individuals with *FTO* genotype and SBP available

2Regression coefficient (beta) and standard error from linear regression of log10(SBP) Z score against log10BMI Z score

3Regression coefficient (beta) and standard error from linear regression of log10(SBP) Z score against log10BMI Z score, adjusted for age

4Geometric means and back-transformed 95% CIs, adjusted for sex

5Effect size (regression coefficient), standard error and *P* value are calculated using linear regression under an additive model, adjusted for sex

6Effect size and standard error values are expressed in SD units

7Effect size (regression coefficient), standard error and *P* value are calculated using linear regression under an additive model, adjusted for sex and age

(g) Diastolic blood pressure (DBP)

| **Study** | **Total N1** | **% male** | **Age, y (median, IQR)** | **Trait-BMI effect size (SE)2** | **Trait-BMI effect size (SE)3** | **Mean diastolic blood pressure in mmHg (95% CI) by genotype4** | | | **Per-A allele effect size (SE)5,6** | ***P* value5** | **Per-A allele effect size (SE)6,7** | ***P* value7** |
| --- | --- | --- | --- | --- | --- | --- | --- | --- | --- | --- | --- | --- |
| **TT** | **AT** | **AA** |
| NFBC1966 | 4427 | 48.2 | 31 (0) | 0.315  (0.014) | - | 76.3 (75.8, 76.8) | 76.7 (76.3, 77.2) | 77.2 (76.4, 78.1) | 0.043 (0.022) | 0.045 | - | - |
| EFSOCH | DBP not available | | | | | | | | | | | |
| Oxford Biobank | 1154 | 51.0 | 42 (36,46) | 0.386 (0.027) | 0.375 (0.027) | 77.9 (77.1, 78.8) | 78.1 (77.3, 78.9) | 78.9 (77.6, 80.2) | 0.045 (0.042) | 0.278 | 0.042 (0.041) | 0.304 |
| Caerphilly | 1080 | 100 | 57 (53,60) | 0.266  (0.029) | 0.268  (0.029) | 86.8 (85.6, 88.1) | 86.7 (85.3, 88.0) | 88.8 (86.8, 90.8) | 0.046 (0.045) | 0.304 | 0.043 (0.045) | 0.338 |
| UKT2D GCC Controls | 4786 | 49.4 | 60 (50,70) | 0.210 (0.014) | 0.213 (0.014) | 78.8 (78.4, 79.3) | 78.8 (78.4, 79.2) | 78.4 (77.7, 79.2) | -0.016 (0.021) | 0.456 | -0.014 (0.021) | 0.499 |
| BWHHS | 3227 | 0 | 69 (64,73) | -0.018  (0.018) | -0.009  (0.018) | 78.6 (78.0, 79.3) | 78.4 (77.8, 79.0) | 78.9 (77.9, 80.0) | 0.007 (0.025) | 0.794 | 0.006 (0.025) | 0.815 |
| InChianti | 945 | 44.0 | 71 (66,77) | 0.196 (0.033) | 0.165 (0.032) | 82.3 (81.3, 83.4) | 81.9 (81.1, 82.7) | 84.3 (83.0, 85.7) | 0.091 (0.046) | 0.051 | 0.101 (0.044) | 0.023 |

1Number of individuals with *FTO* genotype and DBP available

2Regression coefficient (beta) and standard error from linear regression of log10(DBP) Z score against log10BMI Z score

3Regression coefficient (beta) and standard error from linear regression of log10(DBP) Z score against log10BMI Z score, adjusted for age

4Geometric means and back-transformed 95% CIs, adjusted for sex

5Effect size (regression coefficient), standard error and *P* value are calculated using linear regression under an additive model, adjusted for sex

6Effect size and standard error values are expressed in SD units

7Effect size (regression coefficient), standard error and *P* value are calculated using linear regression under an additive model, adjusted for sex and age

(h) Fasting alanine aminotransferase (ALT)

| **Study** | **Total N1** | **% male** | **Age, y (median, IQR)** | **Trait-BMI effect size (SE)2** | **Trait-BMI effect size (SE)3** | **Mean fasting ALT in IU/l (95% CI) by genotype4** | | | **Per-A allele effect size (SE)5,6** | ***P* value5** | **Per-A allele effect size (SE)6,7** | ***P* value7** |
| --- | --- | --- | --- | --- | --- | --- | --- | --- | --- | --- | --- | --- |
| **TT** | **AT** | **AA** |
| NFBC1966 | ALT not available | | | | | | | | | | | |
| EFSOCH | 763 | 60.8 | 34 (31,38) | 0.330 (0.035) | 0.323 (0.035) | 23.3 (22.1, 24.5) | 21.7 (20.7, 22.7) | 24.8 (22.7, 27.0) | 0.006 (0.053) | 0.911 | 0.010 (0.053) | 0.854 |
| Oxford Biobank | ALT not available | | | | | | | | | | | |
| Caerphilly | 1266 | 100 | 57 (53,60) | 0.228  (0.027) | 0.222  (0.027) | 21.6 (20.8, 22.4) | 22.1 (21.3, 22.8) | 21.5 (20.2, 22.8) | 0.009 (0.041) | 0.821 | 0.020 (0.040) | 0.629 |
| UKT2D GCC Controls | ALT not available | | | | | | | | | | | |
| BWHHS | 3185 | 0 | 69 (64,73) | 0.144  (0.018) | 0.137  (0.017) | 12.7 (12.4, 13.0) | 12.7 (12.4, 13.0) | 13.3 (12.8, 13.8) | 0.040 (0.026) | 0.121 | 0.040 (0.025) | 0.117 |
| InChianti | 957 | 43.4 | 71 (66,78) | 0.251 (0.032) | 0.275 (0.031) | 17.4 (16.6, 18.3) | 18.4 (17.6, 19.1) | 18.3 (17.2, 19.5) | 0.064 (0.046) | 0.161 | 0.059 (0.045) | 0.191 |

1Number of individuals with *FTO* genotype and fasting ALT available

2Regression coefficient (beta) and standard error from linear regression of log10(fasting ALT) Z score against log10BMI Z score

3Regression coefficient (beta) and standard error from linear regression of log10(fasting ALT) Z score against log10BMI Z score, adjusted for age

4Geometric means and back-transformed 95% CIs, adjusted for sex

5Effect size (regression coefficient), standard error and *P* value are calculated using linear regression under an additive model, adjusted for sex

6Effect size and standard error values are expressed in SD units

7Effect size (regression coefficient), standard error and *P* value are calculated using linear regression under an additive model, adjusted for sex and age

(i) Fasting gamma-glutamyl transferase (GGT)

| **Study** | **Total N1** | **% male** | **Age, y (median, IQR)** | **Trait-BMI effect size (SE)2** | **Trait-BMI effect size (SE)3** | **Mean fasting GGT in IU/l (95% CI) by genotype4** | | | **Per-A allele effect size (SE)5,6** | ***P* value5** | **Per-A allele effect size (SE)6,7** | ***P* value7** |
| --- | --- | --- | --- | --- | --- | --- | --- | --- | --- | --- | --- | --- |
| **TT** | **AT** | **AA** |
| NFBC1966 | GGT not available | | | | | | | | | | | |
| EFSOCH | 1173 | 74.9 | 33 (30,37) | 0.328 (0.028) | 0.319 (0.028) | 21.6 (20.5, 22.8) | 21.7 (20.8, 22.8) | 23.2 (21.4, 25.3) | 0.054 (0.044) | 0.221 | 0.056 (0.043) | 0.195 |
| Oxford Biobank | GGT not available | | | | | | | | | | | |
| Caerphilly | 1272 | 100 | 56 (53,60) | 0.138  (0.028) | 0.135  (0.028) | 30.7 (29.3, 32.2) | 32.3 (30.7, 33.8) | 31.8 (29.1, 34.6) | 0.044 (0.041) | 0.285 | 0.048 (0.041) | 0.236 |
| UKT2D GCC Controls | GGT not available | | | | | | | | | | | |
| BWHHS | 3194 | 0 | 69 (64,73) | 0.168  (0.017) | 0.168  (0.017) | 22.5 (21.7, 23.3) | 23.2 (22.4, 24.0) | 22.9 (21.6, 24.2) | 0.021 (0.026) | 0.413 | 0.021 (0.026) | 0.412 |
| InChianti | 957 | 43.4 | 71 (66,78) | 0.184 (0.032) | 0.178 (0.033) | 20.8 (19.6, 22.1) | 21.6 (20.5, 22.6) | 20.3 (18.8, 22.0) | -0.011 (0.046) | 0.812 | -0.009 (0.046) | 0.849 |

1Number of individuals with *FTO* genotype and fasting GGT available

2Regression coefficient (beta) and standard error from linear regression of log10(fasting GGT) Z score against log10BMI Z score

3Regression coefficient (beta) and standard error from linear regression of log10(fasting GGT) Z score against log10BMI Z score, adjusted for age

4Geometric means and back-transformed 95% CIs, adjusted for sex

5Effect size (regression coefficient), standard error and *P* value are calculated using linear regression under an additive model, adjusted for sex

6Effect size and standard error values are expressed in SD units

7Effect size (regression coefficient), standard error and *P* value are calculated using linear regression under an additive model, adjusted for sex and age

(j) HbA1c

| **Study** | **Total N1** | **% male** | **Age, y (median, IQR)** | **Trait-BMI effect size (SE)2** | **Trait-BMI effect size (SE)3** | **Mean % HbA1c (95% CI) by genotype4** | | | **Per-A allele effect size (SE)5,6** | ***P* value5** | **Per-A allele effect size (SE)6,7** | ***P* value7** |
| --- | --- | --- | --- | --- | --- | --- | --- | --- | --- | --- | --- | --- |
| **TT** | **AT** | **AA** |
| NFBC1966 | HbA1c not available | | | | | | | | | | | |
| EFSOCH | 999 | 70.5 | 34 (30,38) | 0.114 (0.032) | 0.102 (0.032) | 5.22 (5.18, 5.26) | 5.25 (5.21, 5.28) | 5.26 (5.20, 5.32) | 0.072 (0.047) | 0.129 | 0.075 (0.047) | 0.108 |
| Oxford Biobank | HbA1c not available | | | | | | | | | | | |
| Caerphilly | HbA1c not available | | | | | | | | | | | |
| UKT2D GCC Controls | 4773 | 49.4 | 60 (50,70) | 0.171 (0.014) | 0.161 (0.013) | 5.52 (5.50, 5.53) | 5.51 (5.49, 5.52) | 5.51 (5.49, 5.52) | -0.013 (0.021) | 0.537 | -0.018 (0.019) | 0.349 |
| BWHHS | 3104 | 0 | 69 (64,73) | 0.175  (0.018) | 0.182  (0.018) | 4.92 (4.87, 4.96) | 4.93 (4.89, 4.97) | 4.99 (4.91, 5.06) | 0.041 (0.026) | 0.111 | 0.040 (0.026) | 0.117 |
| InChianti | HbA1c not available | | | | | | | | | | | |

1Number of individuals with *FTO* genotype and HbA1c available

2Regression coefficient (beta) and standard error from linear regression of log10(HbA1c) Z score against log10BMI Z score

3Regression coefficient (beta) and standard error from linear regression of log10(HbA1c) Z score against log10BMI Z score, adjusted for age

4Geometric means and back-transformed 95% CIs, adjusted for sex

5Effect size (regression coefficient), standard error and *P* value are calculated using linear regression under an additive model, adjusted for sex

6Effect size and standard error values are expressed in SD units

7Effect size (regression coefficient), standard error and *P* value are calculated using linear regression under an additive model, adjusted for sex and age

(k) Waist circumference

| **Study** | **Total N1** | **% male** | **Age, y (median, IQR)** | **Trait-BMI effect size (SE)2** | **Trait-BMI effect size (SE)3** | **Mean waist circumference in cm (95% CI) by genotype4** | | | **Per-A allele effect size (SE)5,6** | ***P* value5** | **Per-A allele effect size (SE)6,7** | ***P* value7** |
| --- | --- | --- | --- | --- | --- | --- | --- | --- | --- | --- | --- | --- |
| **TT** | **AT** | **AA** |
| NFBC1966 | 4385 | 48.2 | 31 (0) | 0.883  (0.007) | - | 82.2 (81.7, 82.7) | 83.1 (82.7, 83.6) | 84.1 (83.3, 84.9) | 0.088  (0.022) | 0.00005 | - | - |
| EFSOCH | 893 | 100 | 32 (29,36) | 0.899  (0.015) | 0.891 (0.015) | 90.2 (89.0, 91.3) | 91.8 (90.9, 92.8) | 93.1 (91.3, 95.0) | 0.143 (0.050) | 0.004 | 0.138 (0.049) | 0.005 |
| Oxford Biobank | 1153 | 51.0 | 42 (36,46) | 0.887  (0.014) | 0.884 (0.013) | 85.4 (84.5, 86.4) | 86.1 (85.3, 87.0) | 88.0 (86.5, 89.5) | 0.113 (0.042) | 0.007 | 0.112 (0.042) | 0.007 |
| Caerphilly | 1304 | 100 | 56 (53, 60) | 0.806 (0.016) | 0.805 (0.016) | 92.5 (91.6, 93.3) | 93.9 (93.1, 94.8) | 95.2 (93.7, 96.8) | 0.136 (0.040) | 0.0007 | 0.138 0.040 | 0.0006 |
| UKT2D GCC Controls | 4779 | 49.4 | 60 (50,70) | 0.836 (0.008) | 0.832 (0.007) | 91.1 (90.5, 91.6) | 91.3 (90.9, 91.8) | 93.0 (92.2, 93.9) | 0.072 (0.021) | 0.0006 | 0.069 (0.021) | 0.0008 |
| BWHHS | 3219 | 0 | 69 (64, 73) | 0.854 (0.009) | 0.857 (0.009) | 84.6 (84.0, 85.3) | 85.8 (85.2, 86.3) | 85.9 (84.9, 87.0) | 0.064 (0.026) | 0.013 | 0.065 (0.026) | 0.011 |
| InChianti | 906 | 43.8 | 71 (66,77) | 0.820 (0.019) | 0.805 (0.019) | 90.0 (88.8, 91.3) | 90.5 (89.5, 91.5) | 91.9 (90.3, 93.5) | 0.080 (0.047) | 0.089 | 0.084 (0.046) | 0.067 |

1Number of individuals with *FTO* genotype and waist circumference available

2Regression coefficient (beta) and standard error from linear regression of log10(waist) Z score against log10BMI Z score

3Regression coefficient (beta) and standard error from linear regression of log10(waist) Z score against log10BMI Z score, adjusted for age

4Geometric means and back-transformed 95% CIs, adjusted for sex

5Effect size (regression coefficient), standard error and *P* value are calculated using linear regression under an additive model, adjusted for sex

6Effect size and standard error values are expressed in SD units

7Effect size (regression coefficient), standard error and *P* value are calculated using linear regression under an additive model, adjusted for sex and age

**Supplementary Table 2. Results of the sensitivity analyses compared to the results of the analyses****including all individuals**

**(a) Individuals with diabetes excluded**

| **Phenotype** | **Analyses including all subjects** | | | | | **Sensitivity analyses** | | | | |
| --- | --- | --- | --- | --- | --- | --- | --- | --- | --- | --- |
| **N** | **Expected change in trait Z-score per 0.088SD BMI increase (95%CI)** | ***P*** | **Observed change in phenotype Z-score per A allele (95% CI)** | ***P*** | **N** | **Expected change in trait Z-score per 0.088SD BMI increase (95%CI)** | ***P*** | **Observed change in phenotype Z-score per A allele (95% CI** | ***P*** |
| Fasting insulin | 12095 | 0.038 (0.033, 0.043) | 5×10 -47 | 0.039 (0.013, 0.064) | 0.003 | 11530 | 0.037 (0.032, 0.042) | 8x10-45 | 0.039 (0.015, 0.064) | 0.002 |
| Fasting glucose | 13632 | 0.018 (0.014, 0.021) | 1×10 -25 | 0.024 (0.001, 0.048) | 0.044 | 13108 | 0.015 (0.010, 0.020) | 4x10-9 | 0.017 (>-0.001, 0.034) | 0.055 |
| Fasting HDL-cholesterol | 13659 | -0.026 (-0.029, -0.023) | 2×10 -62 | -0.032 (-0.057, -0.008) | 0.009 | 13138 | -0.026 (-0.029, -0.024) | 5x10-57 | -0.035 (-0.060, -0.011) | 0.005 |
| Fasting LDL- cholesterol | 13476 | 0.011 (0.004, 0.018) | 0.001 | 0.015 (-0.009, 0.040) | 0.215 | 12978 | 0.012 (0.006, 0.018) | 0.0001 | 0.020 (-0.005, 0.045) | 0.119 |
| Fasting triglyderides | 13651 | 0.029 (0.024, 0.033) | 3×10 -39 | 0.028 (0.003, 0.052) | 0.025 | 13127 | 0.028 (0.024, 0.033) | 1x10-36 | 0.029 (0.005, 0.054) | 0.018 |
| Systolic blood pressure | 15624 | 0.019 (0.011, 0.026) | 4×10 -6 | 0.016 (-0.007, 0.039) | 0.164 | 15071 | 0.019 (0.011, 0.027) | 3x10‑6 | 0.013 (-0.010, 0.036) | 0.252 |
| Diastolic blood pressure | 15619 | 0.020 (0.010, 0.030) | 1×10 -4 | 0.021 (-0.002, 0.044) | 0.067 | 15066 | 0.020 (0.010, 0.030) | 7x10-5 | 0.022 (-0.002, 0.045) | 0.067 |
| Fasting ALT | 6171 | 0.021 (0.014, 0.028) | 7×10 -9 | 0.034 (-0.003, 0.070) | 0.069 | 5750 | 0.020 (0.012, 0.029) | 1x10‑6 | 0.030 (-0.007, 0.067) | 0.113 |
| Fasting GGT | 6596 | 0.018 (0.011, 0.025) | 4×10 -7 | 0.026 (-0.009, 0.061) | 0.147 | 6174 | 0.017 (0.010, 0.025) | 4x10‑6 | 0.025 (-0.010, 0.061) | 0.165 |
| HbA1c | 8876 | 0.014 (0.012, 0.017) | 2×10 -33 | 0.015 (-0.015, 0.045) | 0.323 | 8582 | 0.011 (0.007, 0.016) | 2x10‑6 | 0.006 (-0.022, 0.034) | 0.677 |
| Waist circumference | 16639 | 0.075 (0.073, 0.077) | <1×10 -100 | 0.087 (0.065, 0.108) | 9x10-15 | 16101 | 0.075 (0.073, 0.077) | <1×10 -100 | 0.080 (0.058, 0.102) | 9x10-13 |
| BMI | 17037 | - | - | 0.088 (0.066, 0.109) | 2x10-15 | 16493 | - | - | 0.084 (0.062, 0.105) | 6x10-14 |

**(b) Individuals on lipid-lowering medication excluded**

| **Phenotype** | **Analyses including all subjects** | | | | | **Sensitivity analyses** | | | | |
| --- | --- | --- | --- | --- | --- | --- | --- | --- | --- | --- |
| **N** | **Expected change in trait Z-score per 0.088SD BMI increase (95%CI)** | ***P*** | **Observed change in phenotype Z-score per A allele (95% CI)** | ***P*** | **N** | **Expected change in trait Z-score per 0.088SD BMI increase (95%CI)** | ***P*** | **Observed change in phenotype Z-score per A allele (95% CI)** | ***P*** |
| Fasting HDL-cholesterol | 13659 | -0.026 (-0.029, -0.023) | 2×10 -62 | -0.032 (-0.057, -0.008) | 0.009 | 10404 | -0.028 (-0.030, -0.026) | 5x10-140 | -0.038 (-0.066, -0.011) | 0.007 |
| Fasting LDL-cholesterol | 13476 | 0.011 (0.004, 0.018) | 0.001 | 0.015 (-0.009, 0.040) | 0.215 | 10294 | 0.014 (0.006, 0.023) | 0.001 | 0.018 (-0.010, 0.045) | 0.207 |
| Fasting triglycerides | 13651 | 0.029 (0.024, 0.033) | 3×10 -39 | 0.028 (0.003, 0.052) | 0.025 | 10408 | 0.031 (0.026, 0.035) | 1x10-36 | 0.032 (0.004, 0.059) | 0.025 |

**(c) Individuals on blood pressure medication excluded**

| **Phenotype** | **Analyses including all subjects** | | | | | **Sensitivity analyses** | | | | |
| --- | --- | --- | --- | --- | --- | --- | --- | --- | --- | --- |
| **N** | **Expected change in trait Z-score per 0.088SD BMI increase (95%CI)** | ***P*** | **Observed change in phenotype Z-score per A allele (95% CI)** | ***P*** | **N** | **Expected change in trait Z-score per 0.088SD BMI increase (95%CI)** | ***P*** | **Observed change in phenotype Z-score per A allele (95% CI)** | ***P*** |
| Systolic blood pressure | 15624 | 0.019 (0.011, 0.026) | 4×10 -6 | 0.016 (-0.007, 0.039) | 0.164 | 8297 | 0.021 (0.010, 0.033) | 0.0003 | 0.008 (-0.023, 0.039) | 0.617 |
| Diastolic blood pressure | 15619 | 0.020 (0.010, 0.030) | 1×10 -4 | 0.021 (-0.002, 0.044) | 0.067 | 8293 | 0.021 (0.006, 0.035) | 0.005 | 0.031 (>-0.001, 0.061) | 0.051 |

**Supplementary Table 3. Association of *FTO* genotype with metabolic syndrome, as defined by the National Cholesterol Education Program (NCEP).**

| **Study** | **Total N1** | **Age, y (median, IQR)** | **Prevalence (%) of metabolic syndrome by genotype (counts yes/no)** | | | **Odds ratio (95% CI)2** | ***P* value2** | **Odds ratio (95% CI)3** | ***P* value3** |
| --- | --- | --- | --- | --- | --- | --- | --- | --- | --- |
| **TT** | **AT** | **AA** |
| NFBC1966 | 4423 | 31 (0) | 5.32  (89/1583) | 6.93  (143/1920) | 8.87  (61/627) | 1.32 (1.11, 1.56) | 0.001 | - | - |
| EFSOCH | Not included: no blood pressure data | | | | | | | | |
| Oxford Biobank | 1149 | 42 (36,46) | 13.24  (56/367) | 14.21  (76/459) | 19.37  (37/154) | 1.23 (0.98, 1.55) | 0.07 | 1.23 (0.97, 1.55) | 0.09 |
| Caerphilly | 1046 | 56 (53,60) | 18.73  (74/321) | 20.08  (102/406) | 27.97  (40/103) | 1.26 (1.01, 1.56) | 0.04 | 1.26 (1.01, 1.57) | 0.04 |
| UKT2D GCC Controls | 1858 | 59 (50,70) | 15.92  (107/565) | 15.06  (134/756) | 19.59  (58/238) | 1.10 (0.92, 1.31) | 0.30 | 1.10 (0.92, 1.31) | 0.31 |
| BWHHS | 3191 | 69 (64,73) | 43.07  (513/678) | 46.12  (695/812) | 48.88  (241/252) | 1.13 (1.02, 1.24) | 0.02 | 1.13 (1.02, 1.25) | 0.02 |
| InChianti | 888 | 71 (66,77) | 26.33  (74/207) | 28.18  (122/311) | 31.03  (54/120) | 1.12 (0.91, 1.38) | 0.29 | 1.14 (0.92, 1.40) | 0.23 |

1Number of individuals with *FTO* genotype and all relevant traits available

2Odds ratio and *P* value from logistic regression assuming linearity

3Odds ratio and *P* value from logistic regression assuming linearity, with age as a covariate

**Supplementary figure legends**

**Supplementary Figure 1.** **Meta-analysis plots for quantitative traits associated with insulin resistance and the metabolic syndrome.** Effect sizes for (a), (c), (e), (g), (i), (k) and (m): SD change in trait (log10 scale) per 1 SD higher BMI (log10 scale) (equal to the correlation coefficient between log10[trait] and log10[BMI]). Effect sizes for (b), (d), (f), (h), (j), (l) and (n): SD change in trait (log10 scale) per *FTO* A allele.

**Supplementary Figure 1**

**Supplementary References**

1. Rantakallio P: The longitudinal study of the northern Finland birth cohort of 1966. *Paediatr Perinat Epidemiol* 2:59-88, 1988

2. Jarvelin MR, Sovio U, King V, Lauren L, Xu B, McCarthy MI, Hartikainen AL, Laitinen J, Zitting P, Rantakallio P, Elliott P: Early life factors and blood pressure at age 31 years in the 1966 northern Finland birth cohort. *Hypertension* 44:838-846, 2004

3. Taponen S, Martikainen H, Jarvelin MR, Laitinen J, Pouta A, Hartikainen AL, Sovio U, McCarthy MI, Franks S, Ruokonen A: Hormonal profile of women with self-reported symptoms of oligomenorrhea and/or hirsutism: Northern Finland birth cohort 1966 study. *J Clin Endocrinol Metab* 88:141-147, 2003

4. Taponen S, Martikainen H, Jarvelin MR, Sovio U, Laitinen J, Pouta A, Hartikainen AL, McCarthy MI, Franks S, Paldanius M, Ruokonen A: Metabolic cardiovascular disease risk factors in women with self-reported symptoms of oligomenorrhea and/or hirsutism: Northern Finland Birth Cohort 1966 Study. *J Clin Endocrinol Metab* 89:2114-2118, 2004

5. Knight B, Shields BM, Hattersley AT: The Exeter Family Study of Childhood Health (EFSOCH): study protocol and methodology. *Paediatr Perinat Epidemiol* 20:172-179, 2006

6. Shields BM, Knight B, Turner M, Wilkins-Wall B, Shakespeare L, Powell RJ, Hannemann M, Clark PM, Yajnik CS, Hattersley AT: Paternal insulin resistance and its association with umbilical cord insulin concentrations. *Diabetologia* 49:2668-2674, 2006

7. Tan GD, Neville MJ, Liverani E, Humphreys SM, Currie JM, Dennis L, Fielding BA, Karpe F: The in vivo effects of the Pro12Ala PPARgamma2 polymorphism on adipose tissue NEFA metabolism: the first use of the Oxford Biobank. *Diabetologia* 49:158-168, 2006

8. Frayling TM, Timpson NJ, Weedon MN, Zeggini E, Freathy RM, Lindgren CM, Perry JR, Elliott KS, Lango H, Rayner NW, Shields B, Harries LW, Barrett JC, Ellard S, Groves CJ, Knight B, Patch AM, Ness AR, Ebrahim S, Lawlor DA, Ring SM, Ben-Shlomo Y, Jarvelin MR, Sovio U, Bennett AJ, Melzer D, Ferrucci L, Loos RJ, Barroso I, Wareham NJ, Karpe F, Owen KR, Cardon LR, Walker M, Hitman GA, Palmer CN, Doney AS, Morris AD, Smith GD, Hattersley AT, McCarthy MI: A common variant in the FTO gene is associated with body mass index and predisposes to childhood and adult obesity. *Science* 316:889-894, 2007

9. Caerphilly and Speedwell collaborative heart disease studies. The Caerphilly and Speedwell Collaborative Group. *J Epidemiol Community Health* 38:259-262, 1984

10. *The Caerphilly Collaborative Heart Disease Studies: project description and manual of operations*, The Caerphilly and Speedwell prospective Heart Disease Studies, MEU, Cardiff, 1985

11. *The Caerphilly Collaborative Heart Disease Studies: project description and manual of operations*, The Caerphilly and Speedwell prospective Heart Disease Studies, MEU, Cardiff, 1991

12. Starr JI, Horwitz DL, Rubenstein AH, Mako ME: Insulin, proinsulin and C-peptide. In *Methods of hormone radio-immunoassay* Jaffe BM, Behrman HR, Eds. New York, 1979

13. Zeggini E, Weedon MN, Lindgren CM, Frayling TM, Elliott KS, Lango H, Timpson NJ, Perry JR, Rayner NW, Freathy RM, Barrett JC, Shields B, Morris AP, Ellard S, Groves CJ, Harries LW, Marchini JL, Owen KR, Knight B, Cardon LR, Walker M, Hitman GA, Morris AD, Doney AS, McCarthy MI, Hattersley AT: Replication of genome-wide association signals in UK samples reveals risk loci for type 2 diabetes. *Science* 316:1336-1341, 2007

14. Lawlor DA, Bedford C, Taylor M, Ebrahim S: Geographical variation in cardiovascular disease, risk factors, and their control in older women: British Women's Heart and Health Study. *J Epidemiol Community Health* 57:134-140, 2003

15. Lawlor DA, Fraser A, Ebrahim S, Smith GD: Independent associations of fasting insulin, glucose, and glycated haemoglobin with stroke and coronary heart disease in older women. *PLoS Med* 4:e263, 2007

16. Ferrucci L, Bandinelli S, Benvenuti E, Di Iorio A, Macchi C, Harris TB, Guralnik JM: Subsystems contributing to the decline in ability to walk: bridging the gap between epidemiology and geriatric practice in the InCHIANTI study. *J Am Geriatr Soc* 48:1618-1625, 2000

17. Zuliani G, Volpato S, Ble A, Bandinelli S, Corsi AM, Lauretani F, Paolisso G, Fellin R, Ferrucci L: High interleukin-6 plasma levels are associated with low HDL-C levels in community-dwelling older adults: the InChianti study. *Atherosclerosis* 192:384-390, 2007
